# Supplementary material for: Investigation of the intrinsic electric field of nonhydroxyl and hydroxyl ionic liquids by vibrational Stark effect spectroscopy
Source: Royal Society of Chemistry journal article supplement (doi:10.1039/c3ra41190g), 2013-01-01
Supplement: c3ra41190g.pdf [file c3ra41190g.pdf]

### Materials and Synthesis of ILs.

Ethyl thiocyanate (EtSCN) and TMS were from TCI copr.. All ILs studied in this work were prepared according to the well-established procedure, and confirmed by  $^1\text{H}$  NMR. They can be classified into two groups, (I) nonhydroxyl ILs, i.e., 1-butyl-3-methylimidazolium bis(trifluoromethanesulfonyl)amide ([BMIm][NTf<sub>2</sub>]), 1-butyl-3-methylimidazolium hexafluorophosphate ([BMIm][PF<sub>6</sub>]), 1-butyl-3-methylimidazolium tetrafluoroborate ([BMIm][BF<sub>4</sub>]), 1-butyl-3-methylimidazolium perchlorate ([BMIm][ClO<sub>4</sub>]), 1-butyl-3-methylimidazolium nitrate ([BMIm][NO<sub>3</sub>]), 1-butyl-3-methylimidazolium chloride ([BMIm][Cl]), 1-ethyl-3-methylimidazolium tetrafluoroborate ([EMIm][BF<sub>4</sub>]), 1-hexyl-3-methylimidazolium tetrafluoroborate ([HMIm][BF<sub>4</sub>]), 1-octyl-3-methylimidazolium tetrafluoroborate ([OMIm][BF<sub>4</sub>]), 1-decyl-3-methylimidazolium tetrafluoroborate ([DMIm][BF<sub>4</sub>]), trihexyltetradecylphosphonium bis(trifluoromethanesulfonyl)amide ([P<sub>666,14</sub>][NTf<sub>2</sub>]), N-methyl-N-butyl-pyrrolidinium bis(trifluoromethanesulfonyl)amide ([P<sub>14</sub>][NTf<sub>2</sub>]) and N-(2-methoxyethyl)-N-butyl-N,N-dimethyl-ammonium bis(trifluoromethanesulfonyl)amide [N<sub>114,102</sub>][NTf<sub>2</sub>], and (II) hydroxyl ILs, i.e., 1-(2-hydroxyethyl)-3-methylimidazolium bis(trifluoromethanesulfonyl)amide ([HOEMIm][NTf<sub>2</sub>]), 1-(2-hydroxyethyl)-3-methylimidazolium hexafluorophosphate ([HOEMIm][PF<sub>6</sub>]), 1-(2-hydroxyethyl)-3-methylimidazolium tetrafluoroborate ([HOEMIm][BF<sub>4</sub>]), 1-(2-hydroxyethyl)-3-methylimidazolium perchlorate ([HOEMIm][ClO<sub>4</sub>]), and 1-(2-hydroxyethyl)-3-methylimidazolium nitrate ([HOEMIm][NO<sub>3</sub>]). All ILs were dried in vacuum at 80 °C for 10 h prior to analysis. All EtSCN-ILs solutions were made by adding 10 μL EtSCN to 1 mL ILs.

### FT-IR and NMR Measurement

Infrared spectra were recorded on a Thermo-nicolet 5700 FTIR spectrometer relative to a background taken with pure ILs. The sample cell was equipped with KBr windows separated with a Teflon spacer of 160 μm. The spectra were registered 32 scanning times. All EtSCN-ILs solutions were used directly for  $^{13}\text{C}$  NMR spectra determination (Bruker AMX FT 400-MHz NMR spectrometer) without deuterated solvents. TMS in a capillary tube with diameter of 1.8 mm was inserted into the NMR tube.
